# **PtrR (YneJ) is a novel *E. coli* transcription factor regulating the putrescine stress response and glutamate utilization.**

Irina A. Rodionova<sup>1, 2\*</sup>, Ye Gao<sup>1,2</sup>, Anand Sastry<sup>1</sup>, Jonathan Monk<sup>1</sup>, Nicholas Wong<sup>2</sup>, Richard Szubin<sup>1</sup>, Hyungyu Lim<sup>1</sup>, Zhongge Zhang<sup>2</sup>, Milton H. Saier, Jr.<sup>2\*</sup> and Bernhard Palsson<sup>1,3,4\*</sup>

<sup>1</sup>Department of Bioengineering, Division of Engineering, University of California at San Diego, La Jolla, CA 92093-0116, USA.

<sup>2</sup>Department of Molecular Biology, Division of Biological Sciences, University of California at San Diego, La Jolla, CA 92093-0116, USA.

<sup>3</sup>Department of Pediatrics, University of California San Diego, La Jolla, CA 92093, USA

<sup>4</sup>Novo Nordisk Foundation Center for Biosustainability, Technical University of Denmark, Lyngby 2800, Denmark

\*To whom correspondence should be addressed: Prof. Bernhard Palsson, Prof. Milton Saier and Dr. I. Rodionova, <sup>1</sup>Department of Bioengineering, Division of Engineering, and <sup>2</sup>Department of Molecular Biology, Division of Biological Sciences, University of California at San Diego, La Jolla, CA 92093 – 0116; E-mail: [iriodionova@ucsd.edu](mailto:iriodionova@ucsd.edu), [palsson@ucsd.edu](mailto:palsson@ucsd.edu), [msaier@ucsd.edu](mailto:msaier@ucsd.edu).

Running title: YneJ (PtrR) is regulator in putrescine stress response

## **ABSTRACT**

Although polyamines, such as putrescine (Ptr), induce envelope stress for bacteria, they are important as nitrogen and carbon sources. Ptr utilization in *Escherichia coli* involves protein glutamylation, and glutamate stands at a crossroads between catabolism and anabolism. This communication reports that the transcription factor YneJ, here renamed PtrR, is involved in the regulation of a small regulatory RNA gene, *fmrS*, and an operon, *yneIHGF*, encoding succinate-semialdehyde dehydrogenase, Sad (YneI), glutaminase, GlsB (YneH), and several other genes. The *yneI* promoter is activated during putrescine utilization under nitrogen/carbon starvation conditions, and we show that PtrR is important for the putrescine stress response. It is also a

repressor of *fmrS* gene expression, involved in the cascade regulation of mRNA synthesis for the *marA* and *sodB* genes, involved in antibiotic responses. PtrR transcriptional regulation of *fmrS* leads to a regulatory cascade induced by this small RNA that affects mRNA levels of *ompF* and the multidrug resistance regulator, MarA. We propose that PtrR functions as a dual activator/repressor, and that its regulation is important for the responses to different stress conditions involving L-glutamine/L-glutamate and putrescine utilization.

## IMPORTANCE

Putrescine is an important source of nitrogen for many organisms, but it also induces stress. Although its metabolism has been studied extensively, the regulatory mechanisms that control the stress response are still poorly understood. This study reveals that the HTH-type transcriptional regulator, YneJ in *Escherichia coli*, here re-named PtrR, is important for the putrescine stress response, in part because it plays a role in outer membrane porin regulation as a sensor in a regulatory cascade. Direct PtrR transcriptional regulation of the *fmrS*, *yneJ* (*sad*), *gltS* and *ptrR* genes is documented and rationalized, and nine PtrR binding sites were identified using ChIP-Exo. A *ptrR* mutant exhibited altered resistance to a tetracycline group of antibiotics under microaerophilic conditions, suggesting that PtrR indirectly controls expression of porin genes such as *ompF*.

## INTRODUCTION

*Escherichia coli* is a representative of the commensal mammalian intestinal microbiota and the best characterized model gram-negative bacterium. Nutrient starvation conditions are important for the gut microbiome bacterial community as they cause stress, activating different survival mechanisms (1). Many bacterial species, including *E. coli*, can simultaneously utilize L-glutamate (Glu) and the polyamine, putrescine (Ptr) under carbon/nitrogen starvation conditions, supporting bacterial growth using the PuvABCD pathway for Ptr utilization (Fig.1) (2). Glu is also essential for tetrahydrofolate polyglutamylation (3), for L-arginine biosynthesis, and for several other metabolic pathways. Ptr is important for bacterial growth and for efficient DNA replication, transcription, and translation (4,5). Organic polycationic molecules such as Ptr play important roles in maintaining compact conformations of negatively charged nucleic acids (6). However, high concentrations of extracellular Ptr are toxic for *E. coli*, altering the charge of outer membrane porins such as OmpF and OmpC (7,8), and Ptr is involved in multiple antibiotic resistance mechanism under stress conditions (7). The pore sizes decrease, resulting in pore

closure, decreasing outer membrane permeability, and inducing stress response by activating Sigma E (Fig 1A). Recently, the transporter, AceI, and other members of the PACE family have been shown to function in the efflux of naturally occurring polyamines (9). These compounds have been described as key-signals for virulence in pathogenic bacteria, and they can support growth as nitrogen and carbon sources (10).

In bacteria, the processes of Ptr uptake, synthesis, degradation, and export are coordinated to stringently regulate intracellular polyamine levels. Here, we demonstrate by ChIP-exo assays that the LysR-family transcriptional regulator, YneJ (PtrR), binds to the promoter regions of at least eleven genes. A *yneJ* mutant was shown previously to be resistant to bacteriophage lambda infection, probably because it transcriptionally regulates *lamB* (malto porin)(11). RNA sequencing analyses suggested that PtrR under carbon starvation conditions with the addition of L-glutamine and Ptr repressed the *sad* (*yneI*) and *fnrS* genes (Fig. 1A), encoding succinate-semialdehyde dehydrogenase (SSADH) and a small RNA. In addition, the *yneI* operon encodes glutaminase (YneH), and two hypothetical proteins, YneG and YneF. The regulatory small RNA, FnrS, is known to regulate mRNA stability for the transcriptional activator of the multiple antibiotic resistance gene *marA* (12). FnrS is regulated by Fnr and ArcA (13). The transcriptional regulation of FnrS by PtrR is likely important for the Ptr-induced stress response.

Ptr utilization is catalyzed by enzymes encoded by the *puuABCDE* operon in *E. coli* and involves degradation of putrescine to  $\gamma$ -aminobutyric acid (GABA) via  $\gamma$ -glutamylated intermediates (Fig. 1A). PuuA, glutamate-Ptr ligase, the first enzyme in the pathway, and is regulated at the transcriptional level by PuuR, Fnr, and phosphorylated ArcA (2). Although the putrescine pathway enzymes PatA (YgiG) and PatD (YdcW) comprise a pathway for the degradation of putrescine without glutamylation (14), the *PuuABCDE* pathway is essential for Ptr utilization in *E. coli* using PuuP as the major transporter (Fig. 1A) (15).

It is not entirely clear why *E. coli* and many other bacteria have two genes encoding 4-aminobutyrate aminotransferases (GABA-ATs) (GabT and PuuE or GoaG) as well as two succinate semialdehyde dehydrogenases (SSADHs) (GabD and YneI or Sad)(16,17). The explanation may have to do in part with the fact that regulation of *gabDT* and the GABA transporter gene, *gabP*, serves for GABA utilization. The *csiD-ygaF-gabDTP* region is sigma S

( $\sigma^S$ ) controlled (18), and activation of an internal promoter within *gabD* is also under the control of  $\sigma^S$  (19). GabT function has been well studied (19-21).

Expression analyses of P<sub>puuE</sub> and Y<sub>neI</sub> have also been reported (22,23), but as noted above a transcriptional regulator for the *yneI* gene had not been found. P<sub>puuE</sub> is important for GABA metabolism in *E. coli* and is induced by the addition of putrescine to the medium. It is repressed by succinate under low aeration conditions, although in contrast, the *gabT* expression level is not influenced under these conditions. However, under respiratory stress conditions, other data suggest dramatic up-regulation of GabT and GabD as well as genes for respiration, the glyoxylate shunt, and motility (24). Moreover, Y<sub>neI</sub> is induced by putrescine in the medium while GabD is not. In *E. coli*, both P<sub>puuE</sub> and Y<sub>neI</sub> are important for the utilization of putrescine as a sole carbon source. GABA utilization-related Y<sub>neI</sub> (the structure of which is known (25)) has been shown to be essential for the utilization of putrescine as a carbon source (22). However as noted above, GABA utilization enzymes are redundant in *E. coli*; the genes for SSADH are *gabD* and *yneI*, while those for the GABA aminotransferases (GABA-AT) are *gabT* and *puuE*. The GABA shunt may have pleiotropic functions under different stress conditions (21).

In this study, we investigated P<sub>tr</sub>-dependent regulation, important for the P<sub>tr</sub> stress response and for P<sub>tr</sub> utilization by the coordination of *yneIHGF*, *f<sub>nr</sub>S*, and likely *gltS* transcription. The binding sites upstream of *yneI*, *ptrR* (*yneJ*), *gltS*, and *f<sub>nr</sub>S* were identified using the ChIP-exo method, and were used to determine the consensus predicted, based on the alignment of the *yneI* and *f<sub>nr</sub>S* or *ptrR* and *f<sub>nr</sub>S* upstream sequences for the P<sub>tr</sub> ChIP-exo protected areas (Fig. 2A and B). In fact, a total of nine binding sites with different intensities for P<sub>tr</sub> were identified (Table 1, Fig. 2B), and our experiments revealed regulation by the binding of P<sub>tr</sub> upstream of the *ptrR*, *yneI* and *f<sub>nr</sub>S* genes. It is likely, that P<sub>tr</sub> transcriptionally regulates the *ydiFO* genes, which encode acetyl CoA transferase and acyl-CoA dehydrogenase involved in the fatty acid degradation pathway (26). P<sub>tr</sub> is therefore a novel pleiotropic LysR family transcriptional factor, and it represses transcription of *f<sub>nr</sub>S* and *yneIH*. The activity of the *yneI* promoter has been shown to increase upon addition of P<sub>tr</sub> to the growth medium under nitrogen starvation conditions (Fig.2C), and a *ptrR* mutant showed a growth defect in M9 medium supplemented with Glu as a sole nitrogen source and glycerol as a carbon source. The positive effect for the growth of *ptrR* and *ydiF* mutants on P<sub>tr</sub> and Glu as nitrogen sources under carbon starvation was also shown. We conclude that P<sub>tr</sub> controls the P<sub>tr</sub> stress response and

Glu utilization in *E. coli*, probably in part in response to GABA availability. The degraded palindromic consensus for the PtrR binding motif for the *fnrS* and *yneI(sad)-yneJ* genes was determined. The predicted PtrR regulons in other bacteria revealed novel MFS transporters possibly related to GABA utilization.

## RESULTS

### Predicted regulatory PtrR binding sites and ChIP-exo results.

The putative binding site for PtrR, located close to the Sigma E ( $\sigma^E$ )-dependent promoter region of *yneI*, was predicted using a bioinformatics approach and confirmed by ChIP-exo results (Fig.2A and B, Table 1). The sequence logo for identified PtrR-binding sites from the intergenic region of the *yneJ* (*ptrR*) and *yneI* genes from *E. coli* and closely relates enterobacteria, as well as similar DNA sites identified upstream of the *fnrS* genes is shown in Fig. 2B. The *yneI-sad* operon is well conserved in Enterobacteria, but in *Enterobacter*, the operon includes an additional gene for the methyl-accepting chemotaxis protein I (serine chemoreceptor protein, Mcp) (Fig. 1B). A bioinformatics approach for consideration of the co-regulation of the *ptrR* and *puuABCDE* genes revealed that *ptrR* is present in the genomes of organisms that lack the *puuABCDE* genes. In these organisms, the pathway for Ptr utilization without glutamylation involves PatAB (Fig.1A), suggesting that regulation of the polyamine stress response via *fnrS* gene repression is an additional function of the PtrR regulator.

PtrR regulatory binding sites were identified by ChIP-exo. PtrR binds upstream of the *fnrS*, *gltS*, *ptrR* (*yneJ*), and *yneI* genes, and in an intragenic region of *yhiQ* and *ydiF*. It is also likely to be involved in its own autoregulation. PtrR (YneJ) binding sites for the *gltS* gene were found to be upstream of the promoter (Fig. S1). The *yne* operon appears to be regulated by the stress sigma factor E in addition to PtrR.

### *E. coli* growth on glutamate as a nitrogen source and an additional carbon source.

Growth of BW25113 (WT) as well as *ptrR* null mutant strains could occur in M9 medium with glucose or glycerol as the carbon source and Glu as the nitrogen source, but not with Glu as the sole carbon and nitrogen source. Cells showed a growth deficiency when the *ptrR* gene was deleted under nitrogen and carbon starvation conditions with both Glu and glycerol present in

minimal medium (Fig. 3). A decrease in the growth rate was observed on glycerol (carbon starvation) for the *ptrR* mutant (Fig 3), suggesting that activation of the *gltS* promoter is essential for rapid growth. Substantiating this possibility, the *gltS* null mutant was growth deficient in M9 medium to the same extent under these defined conditions. However an mRNA level change for *gltS* in the *yneJ* mutant was not detected; instead, the *yneI* mRNA level was higher in the *ptrR* mutant. This result suggests that the flux through YneI (Sad) was increased in the *ptrR* mutant, probably decreasing Glu input as a nitrogen/carbon source. Strong upregulation of the *sad* gene in the *ptrR* mutant relative to the WT *E. coli* BW25113 strain was observed by mRNA level measurements during growth on Glu as the single nitrogen source and glycerol as the carbon source (Table S1). The *ptrR* mutation led to the upregulation of L-histidine and L-methionine biosynthetic pathway genes *hisABCD FHI* and *metABEFLR*, respectively. Additionally, upregulation of more than a hundred genes including *fliA*, *ddg*, *dppBCDF*, *cspA*, *ybdHL*, and *ykfD* observed in the *ptrR* mutant.

CspA is a cold shock protein regulating many genes, likely related to starvation conditions. The RNAseq analysis using the recently developed independent component analysis (ICA) showed that the modulon (27) for *cspA* includes *lpxP*, the transferase involved in KDO-lipid A modification under cold shock conditions. We showed that under carbon starvation, especially for the *ptrR* mutant, the CspA modulon genes were highly induced. The enterobacterial common antigen biosynthetic genes, *wecCD* and *rffH*, were also upregulated in the mutant.

Growth suppression for the *ptrR* mutant was observed under microaerobic conditions in 96-well plates with L-glutamate as the nitrogen source and glycerol as the carbon source (Fig. 3). In contrast, no difference was detected in the growth rate for the *ptrR* mutant when cells were grown on glucose as the carbon source with glutamate as the nitrogen source (data not shown). We tested the microaerobic conditions using Biolog plate PM2A for *ptrR* mutant growth compared with that of the *E. coli* WT BW25113 strain. The difference in growth rate using Glu as the nitrogen source was minimal when D-glucosamine, dihydroxyacetone or D-lactate methyl ester was the carbon source. Poor growth of the mutant with glycine, 5-keto-gluconate, L-ornithine, or gamma-hydroxybutyrate as a carbon/nitrogen source was observed using M9 medium with L-glutamate as the nitrogen source.

Deficiencies of *ptrR* mutant growth with D-allose, D-tagatose, turanose, oxalomatic acid,

methyl-glucuronide, gamma-hydroxybutyrate, glycine and L-alaninamide were detected under the same conditions with Glu as a supplement (Fig S2, Table S2). A small difference for growth with D-arabinose and 5-keto-gluconate was detected using the same conditions. No difference in growth rate was observed when dihydroxyacetone, D-lactate methyl ester, or melibionate was the carbon source.

### **The regulatory effect of PtrR during growth with putrescine or Glutamate as the nitrogen source**

M9 medium with glycerol as the primary carbon source, along with the Ptr and Glu both present as carbon/nitrogen sources, supported the growth of BW25113 (WT) as well as *ptrR*, *yneH*, and *ydiF* null mutant strains (Fig. 4). The WT strain had a longer lag-phase compared to the *yneJ* mutant, possibly because transcriptional regulation plays a role in normal growth. The presence of Ptr as a nitrogen source induced the *yne* operon during nitrogen/carbon starvation. Derepression of the operon occurred in the *yneJ* mutant, which led to faster adaptation to Ptr. The importance of *yne* operon expression under M9 carbon/nitrogen starvation conditions with Ptr as a nitrogen source was demonstrated. A growth deficiency for a *yneH* mutant was observed under the same conditions. The effect of a *yneH* deletion was strongest as cells approached the stationary phase. This result is interesting because Sigma E-dependent promoters have been shown to be induced in stationary phase (28).

The *ydiF* mutant phenotype is shown in Fig.4. A PtrR binding site was found inside the *ydiF* gene. *ydiO*, downstream of *ydiF*, but within the operon with *ydiF*, encoding acyl-CoA dehydrogenase, is potentially affected by PtrR at low concentrations of Ptr, and an *ydiF* null mutant had a similar phenotype as that of the *yneJ* mutant. It is possible that YdiF-YdiO interferes with the usage of succinate, produced from Ptr. This could reduce the succinate pool, which is important for fatty acid biosynthetic fluxes, negatively affecting metabolic pathways during growth on Ptr as an additional carbon source. The *ydiO* gene has been shown to be important for the utilization of fatty acids in a *fadE* mutant of *E. coli* (26).

### **PtrR-dependent regulation during growth with Ptr/Glu as nitrogen sources.**

The *E. coli* WT and the *yneJ* mutant were grown in M9 medium with 20 mM Glu and 8 mM Ptr as nitrogen sources and 0.2 % glycerol as the primary carbon source. The growth phenotypes are



shown in Fig. 3. To determine the effect of the *ptrR* deletion mutation, the cells were collected at the end of log-phase, and total mRNA was purified (see Materials and methods). *PuuR* and *PuuADE* mRNA levels increased in the *ptrR* mutant strain, possibly explaining the faster growth of the mutant under the experimental conditions, but lower final OD<sub>600</sub> in the stationary phase (Fig.2A). Although the binding of *PtrR* in the *puu* operon promoter area was not demonstrated using the ChIP-exo method, the effect of deletion of *yneJ* on *Ptr* utilization gene expression (direct or indirect through derepression of *yneI*) defined *PtrR* as a *Ptr* related transcriptional regulator. It is interesting that two copper related transport systems were upregulated in the *ptrR* mutant. These genes encode *CopA* (copper efflux system) and the *CusSR* regulated *CusABC* system (a cation efflux system), shown as copper I-modulon, additionally including *cusF* and *cueO*. The *FnrS* and *RyhB* small RNAs influence a regulon that includes *SodB* (superoxide dismutase), as evidenced by their binding to the *SodB* mRNA (see *EcoCyc*). *SodB*, *RpmL*, *YihD*, and *PuuRADE* mRNAs were substantially higher due to the loss of *ptrR* compared to the WT strain (Table 2). It is likely that the effect of *fnrS* transcriptional derepression, due to the *ptrR* mutation, led to an increase in the *SodB* mRNA level under these experimental conditions.

### ***PtrR*-dependent regulation of the *fnrS* and *ompL* genes, and *yne* operon expression under putrescine stress conditions.**

The *ptrR* mutant and the wild type BW25113 strain were grown aerobically in M9 medium under carbon starvation conditions (glycerol as the carbon source), supplemented with 20 mM L-glutamine and 10 mM *Ptr*. RNA sequence data were generated during the exponential growth phase. The effects of putrescine on the *ptrR* mutant were determined by RNA-seq analysis. The mRNAs whose levels were depressed in the WT strain compared to the *ptrR* mutant are *yneH* (*glsB*), *yneI* (*sad*), and *yneG*. The mRNA levels for *acrS*, *tolC*, *yihO*, *ompL* and *ompF* were higher in the WT strain (Table S3), suggesting a regulatory cascade for *PtrR*-*FnrS*-*MarA*-*MicF*-*OmpF* and *PtrR* transcriptional activation of the *yihPO-ompL* operon. *MarA* alters the expression of more than sixty chromosomal genes (29), and efflux/influx-related genes are important for the *MarA*-related phenotype. ChIP-exo showed *PtrR* binding in *yihQ* gene, but only part of operon (*yihO-ompL*) mRNA was found to be differentially expressed. It is likely that *PtrR* is activator for the *yihPO-ompL* and/or mRNA degradation is involved in the mRNA homeostasis. The operon is conserved in Enterobacteria as shown by use of the PubSeed database (Fig. S3).



We decided to test the *ptrR* mutant for antibiotic resistance using Biolog plate 11C (30). This regulatory mutant showed increased resistance to high concentrations of demeclocycline, a tetracycline group antibiotic, which showed growth/respiration after 3 days, but poor growth/respiration compared to the *E. coli* WT strain in the presence of certain concentrations of lomefloxacin, cloxacillin, colistin, and potassium tellurite, but no difference was observed with respect to the resistance to other antibiotics tested. The resistance of the *ptrR* mutant, also to the tetracycline analog, chlorotetracycline, suggests that *ompF* mRNA was downregulated under these experimental conditions. The role of the outer membrane barrier for efflux-mediated resistance has been discussed (31). MarA activates *tolC*, *zwf*, *micF*, *ybjC*, *sodA*, *inaA*, and *mdaB*, but the small RNA, MicF, specifically inhibits *ompF* mRNA translation (32).

### **Promoter activity for *yneI* under nitrogen starvation and Ptr-induced stress conditions.**

The activity of the promoter for the *yneI* gene was measured during growth in M9 medium with Glu or L-Glutamine as the sole nitrogen source and glycerol as the carbon source, but no activation was observed (data not shown). In contrast, under the same conditions, but with Ptr present, the promoter activity for *yneI* increased steadily under nitrogen starvation conditions with Glu as nitrogen source (Fig.2B). The activation effect was not detected in glycerol-M9 medium with NH<sub>4</sub>Cl as the nitrogen source.

We found that PtrR regulates the outer membrane porin encoded by the *ompF* gene (likely via FnrS) as well as the *yne* operon (Table S3). Transcription of the *E. coli yneIHGF* operon was induced when Ptr was present under nitrogen starvation conditions. The operon encodes Glu/Ptr catabolic pathway enzymes and is conserved among many Gram-negative bacteria (Fig. 1). The PtrR regulon includes the *yneIHGF* operon and the *gltS* gene as a part of the putrescine utilization pathway since PtrR regulates the promoter of the *yneI* gene under Ptr-induced stress conditions. As noted above, the *yne* operon includes *yneI* (*sad*) and *yneH* (*glsB*), and repression of *sad* was shown by RNA-seq data. The Glu transporter gene, *gltS*, is likely activated by PtrR, which could be important for *E. coli* growth with Glu as a nitrogen source and glycerol as a carbon source (nutrient starvation conditions). YneI (Sad) is known to be involved in Ptr utilization (22). Using the ChIP-exo method, we showed that PtrR has nine binding sites in *E. coli* for genes including the glutamate transporter gene, *gltS*, the regulatory sRNA gene, *fnrS* and *yihQO*. Phenotypic analysis and RNAseq results for a *ptrR* deletion mutant confirmed that

transcriptional regulation of the *yneIHGF*, *fnrS* and possibly the *yihOP-ompL* was important during Ptr and glutamine utilization and stress response.

### **Prediction of PtrR binding consensus for *fnrS* and the *yneI-yneJ* genes.**

We created multiple alignments of the upstream DNA sequences of closely related species with the beginning of the *E. coli* gene for *fnrS*, as well as upstream of the *yneI* and *yneJ* (*ptrR*) genes. These binding sites correspond to the ChIP-exo protected areas. The binding sites TTCACGAATCGaGAA, TTCtCGATTCGTGAA, and TgaAtGcAaCGTcAA were found for *yneJ* (*ptrR*), *yneI*, and *fnrS*, respectively (Fig. 5). The fluorescent polarization assay showed binding for PtrR refolded protein in the presence of 10 mM urea to the predicted *yneI* binding site. The addition of GABA lead to dissociation of the PtrR from fluorescently labeled DNA (Fig. S5). The PtrR potential binding sites for *yihO* and *yaiYZ* encoding transporters and *asnB*, asparagine synthetase B and uncharacterized protein, *ycdY*, were predicted and confirmed by RNAseq data (Tables S1, S3). *ycdY* gene is conserved in genome cluster with *potABCD* encoding ABC type transporter and gamma-aminobutyraldehyde dehydrogenase gene, *patD*, involved Ptr utilization (Fig.1). The PtrR binding sites for species of *Pseudomonas*, *Salmonella*, *Yersinia*, *Serratia*, *Klebsiella*, *Enterobacter*, *Citrobacter*, *Erwinia*, and *Shigella* were also identified, predicting *yne* operon regulation similar to that observed for *E.coli*. The predicted regulatory sites for MFS family transporter, likely related to GABA or succinate semialdehyde uptake in seven *Yersinia*, three *Serratia*, one *Erwinia carotovora*, and one *Pseudomonas aeruginosa* genomes were identified. In some of these genomes, the regulons are the same as the *E. coli yne* operon and include *yneI* and *yneH*, but binding site for *fnrS* was not found. In *Pseudomonas*, and many of these  $\gamma$ -Proteobacteria the *yneI(sad)* gene is regulated by PtrR, but in *Enterobacter sp.* 638 and *Citrobacter koseri* additional genes are included (Fig. 5).

## **DISCUSSION**

In this study, we have characterized PtrR (YneJ) as one of the transcriptional regulators for operon encoding glutaminase, the GABA shunt SSADH, YneI (Sad), GlxB (YneH), and the uncharacterized proteins, YneG and YneF, as well as *yihPO-ompL* operon, the gene encoding the glutamate transporter, *gltS*, and the small RNS, FnrS. We found that PtrR is important for the Ptr

and L-glutamine stress response and utilization of L-glutamate as a sole nitrogen source with glycerol as the carbon source under the carbon starvation stress conditions used in our studies. We further demonstrated PtrR binding to the predicted DNA-binding site using the ChIP-exo method. An increase in the promoter activity for *yneI* under putrescine stress conditions with either nitrogen or carbon starvation was found to be PtrR dependent. PtrR is a repressor for the *yneIHFG* operon under these stress conditions.

Based on the growth phenotypes, PtrR-mediated regulation appears to be important for Glu utilization as a nitrogen source in the presence of a poor carbon source such as glycerol. A pleiotropic effect of the PtrR-dependent regulation of the sigma E-dependent *yneIHGF* operon under nitrogen/carbon starvation is related to Ptr-induced envelope stress conditions. Analogous to the known stress/starvation sigma  $\sigma^S$ -controlled *csiD-ygaF-gabDTP* region (15,19), the *yne* operon is dependent on the environmental sigma factor  $\sigma^E$ . Growth of the *ptrR* mutant with Glu as the sole nitrogen source and glycerol as the carbon source allows production of ppGpp (33,34).

Ptr is involved in both envelope stress and starvation stress, and the importance of PtrR regulation of the *yne* operon under these stress conditions was shown by assay of  $\beta$ -galactosidase. The *yne* promoter was highly upregulated under carbon/nitrogen starvation conditions with 20 mM Ptr and 20 mM Glu as nitrogen sources or with Glu as a nitrogen source (RNA-seq data) and glycerol as a carbon source (Fig. 2). The growth deficiency of the *ptrR* mutant suggested that PtrR-dependent activation of the *gltS* promoter occurs under nitrogen starvation conditions. However, a difference in mRNA level was not detected. PtrR autorepressor function was suggested from the binding site position, downstream of the *ptrR* promoter (Fig. 2). The *ptrR* mutant strain has a growth deficiency in the presence of Glu as the sole nitrogen source, suggesting the importance of PtrR-dependent repression of the *yne* operon encoding the GABA-utilization YneI (SSADH) and glutaminase, YneH. It is interesting that a methyl accepting regulator protein (Tar) was upregulated in the *E. coli ptrR* mutant under nitrogen starvation conditions (Table 2).

Extracellular Ptr alters the OmpF porin charge and pore size, resulting in partial pore closure and a consequent decrease in outer membrane permeability (8,35). The transcriptional regulation of *ompF* is known to be regulated by a cascade mechanism involving FnrS and MarA (36,37). PtrR is important for the regulation of the *fnrS* gene as well as the GABA shunt

involving the YneI SSADH, the YneH glutaminase, and at least in some enterobacteria, a chemotaxis response-related gene. The *ptrR* null mutant had reduced *ompF* and *ompL* mRNA during growth in M9 media with glycerol as the carbon source and an L-glutamine supplement, potentially regulated through the FnrS-*marA* regulatory cascade and direct transcriptional regulation of the *yihQPO-ompL* operon. This results in increased resistance to the tetracycline group of antibiotics (i.e., demeclocycline and chlorotetracycline), but not chloramphenicol, erythromycin, and other antibiotics present on Biolog plate 11C (Fig. S2). PtrR thus regulates the *yneIHGF* operon in response to nitrogen and carbon starvation and under Ptr-induced stress conditions in *E. coli*. PtrR transcriptional regulation may explain the Ptr connection with antibiotic resistance development under stress conditions.

## MATERIAL AND METHODS

**Bacterial strains and plasmids.** All mutant strains for *yneJ*, *ydiF* and *yneH* were derived from the Keio collection. The parent strain is BW25113 (WT). This reference strain was utilized in growth screens and specified as “wild type”. The strains utilized in the growth screens were first verified using the polymerase chain reaction. The strains for *yneI* promoter LacZ fusions are described in Supplemental Materials.

**Media and growth of cells.** All cell cultures were grown overnight in LB media and refreshed the next day for 2 hours. An altered M9 medium was prepared with 10 or 20 mM of Glu and/or Ptr as the nitrogen source and glycerol or glucose as the carbon source. All cultures were diluted to an absorbency at 600 nm of 0.05 in 5 mL of the altered M9 media in culture tubes. Cultures were then transferred for growth detection, or putrescine was added to the growth media to induce putrescine stress. Growth measurement were detected using a BioTek 800 96-well plate reader.

Cultures were grown under the different conditions in culture tubes for an additional 3-5 hours, and 200-400 µl samples were collected and stored frozen at -20°C for subsequent LacZ assay measurements. The absorbance at 600 nm was measured for each sample in a BIO-RAD SmartSpec Plus Spectrometer.

**RNA sequencing.** RNA sequencing data were generated under aerobic exponential growth conditions in M9 medium or under carbon/nitrogen starvation conditions with 0.8% glycerol as the carbon source, with 10 mM putrescine and/or 20 mM glutamate as nitrogen sources or M9

medium supplemented with 10 mM putrescine, 10 mM L-glutamine and 0.8% glycerol as the nitrogen/carbon source. The wild type BW25113 strain was grown as a control for the isogenic *ptrR* mutant strain. Pre-cultures for the RNA sequencing experiments were taken by scraping frozen stocks and growing the cells in LB medium. Cells were washed twice with M9 medium and inoculated at an OD<sub>600</sub> of 0.05. The cells were collected at an OD<sub>600</sub> of 0.9 and were harvested using the Qiagen RNA-protect bacterial reagent according to the manufacturer's specifications. Pelleted cells were stored at -80°C, and after cell resuspension and partial lysis, they were ruptured with a beat beater; the total RNA was extracted using a Qiagen RNA purification kit. After total RNA extraction, the quality was assessed using an Agilent Bioanalyser using an RNA 6000 kit after removal of ribosomal RNA. Paired-end strand specific RNA sequencing libraries were prepared as described (38).

**LacZ enzyme assays.** A LacZ buffer with 23 µg/ml of β-mercaptoethanol added, referred to as Z-buffer, was prepared for β-galactosidase assays (39,40). All samples were defrosted, and 200 µl of sample was mixed with 800 µl of Z-buffer and 25 µl of chloroform. All tubes were twice vortexed for 10 seconds and then incubated at 37°C for 40-90 min, after which 200 µl of ortho-nitrophenyl-β-galactoside was added. The reaction was stopped with 500 µl of 1M Na<sub>2</sub>CO<sub>3</sub>, and each sample was centrifuged at 13,000 rpm. An aliquot of 200 µl of the supernatant from each sample was transferred to a 96 well microplate, and the absorbance was measured at 405 nm, 450 nm, and 490 nm in a BioTek ELx808 Plate Reader. β-galactosidase activity was measured in Miller units.

### ChIP-exo experiments

The strains harboring 8-myc were generated by a λ red-mediated site-specific recombination system, targeting the C-terminal region as described previously (41). ChIP-exo experimentation was performed following the procedures previously described (42,43). To identify PtrR binding sites for each strain the DNA bound to PtrR from formaldehyde cross-linked cells was isolated by chromatin immunoprecipitation (ChIP) with the antibodies that specifically recognize the myc tag (9E10, Santa Cruz Biotechnology), and Dynabeads Pan Mouse IgG magnetic beads (Invitrogen) were added, followed by stringent washings as described previously. ChIP materials (chromatin-beads) were used to perform on-bead enzymatic reactions of the ChIP-exo method. Briefly, the sheared DNA of the chromatin-beads was repaired by the NEBNext End Repair

Module (New England Biolabs), followed by the addition of a single dA overhang and ligation of the first adaptor (5'-phosphorylated) using a dA-Tailing Module (New England Biolabs) and NEBNext Quick Ligation Module (New England Biolabs), respectively. Nick repair was performed by using the PreCR Repair Mix (New England Biolabs). Lambda exonuclease- and RecJf exonuclease-treated chromatin was eluted from the beads, and overnight incubation at 65 degree reversed the protein-DNA cross-link. RNA- and protein-free DNA samples were used to perform primer extension and second adaptor ligation with the following modifications. The DNA samples, incubated for primer extension as described previously (38), were treated with the dA-Tailing Module and NEBNext Quick Ligation Module (New England Biolabs) for second adaptor ligation. The DNA sample, purified using the GeneRead Size Selection Kit (Qiagen), was enriched by polymerase chain reaction (PCR) using Phusion High-Fidelity DNA Polymerase (New England Biolabs). The amplified DNA samples were purified again with a GeneRead Size Selection Kit (Qiagen) and quantified using Qubit dsDNA HS Assay Kit (Life Technologies). The quality of the DNA sample was checked by running the Agilent High Sensitivity DNA Kit using an Agilent 2100 Bioanalyzer before sequencing using HiSeq 2500 (Illumina) following the manufacturer's instructions. Each modified step was also performed following the manufacturer's instructions. ChIP-exo experiments were performed in duplicate. For the prediction of the PtrR consensus binding sequence for the *yneI*, *fmrS* and *yneJ*, *fmrS* upstream areas, they were downloaded using the PubSEED database for *E. coli* and closely related species. We constructed multiple alignments of the closely related species upstream regions for the genes that correspond to ChIP-exo protected areas. The length of the binding motif was limited to 15 bp using the MEME tool.

### **Fluorescent polarization assay (Supplemental Material)**

### **CONFLICT OF INTEREST**

The authors declare that they have no conflict of interest with respect to the contents of this article.

### **ACKNOWLEDGEMENT**

We would like to thank Marc Abrams (UCSD) for editing the manuscript and Dmitry Rodionov for prediction of YneJ regulatory binding sites.

## FUNDING

This work was supported by NIH grant U01AI124316 and Novo Nordisk Foundation Grant Number NNF10CC1016517 as well as NIH grant GM077402.

## REFERENCES

1. Lachnit, T., Bosch, T. C. G., and Deines, P. (2019) Exposure of the Host-Associated Microbiome to Nutrient-Rich Conditions May Lead to Dysbiosis and Disease Development-an Evolutionary Perspective. *mBio* **10**
2. Kurihara, S., Oda, S., Tsuboi, Y., Kim, H. G., Oshida, M., Kumagai, H., and Suzuki, H. (2008) gamma-Glutamylputrescine synthetase in the putrescine utilization pathway of Escherichia coli K-12. *J Biol Chem* **283**, 19981-19990
3. Rodionova, I. A., Goodacre, N., Do, J., Hosseinnia, A., Babu, M., Uetz, P., and Saier, M. H., Jr. (2018) The uridylyltransferase GlnD and tRNA modification GTPase MnME allosterically control Escherichia coli folylpoly-gamma-glutamate synthase FolC. *J Biol Chem* **293**, 15725-15732
4. Li, J., Zhang, L., Xiong, J., Cheng, X., Huang, Y., Su, Z., Yi, M., and Liu, S. (2019) Polyamines Disrupt the KaiABC Oscillator by Inducing Protein Denaturation. *Molecules* **24**
5. Latour, Y. L., Gobert, A. P., and Wilson, K. T. (2019) The role of polyamines in the regulation of macrophage polarization and function. *Amino Acids*
6. Publio, B. C., Moura, T. A., Lima, C. H. M., and Rocha, M. S. (2018) Biophysical characterization of the DNA interaction with the biogenic polyamine putrescine: A single molecule study. *Int J Biol Macromol* **112**, 175-178
7. Tkachenko, A. G., Pozhidaeva, O. N., and Shumkov, M. S. (2006) Role of polyamines in formation of multiple antibiotic resistance of Escherichia coli under stress conditions. *Biochemistry (Mosc)* **71**, 1042-1049
8. Dela Vega, A. L., and Delcour, A. H. (1996) Polyamines decrease Escherichia coli outer membrane permeability. *J Bacteriol* **178**, 3715-3721



9. Hassan, K. A., Naidu, V., Edgerton, J. R., Mettrick, K. A., Liu, Q., Fahmy, L., Li, L., Jackson, S. M., Ahmad, I., Sharples, D., Henderson, P. J. F., and Paulsen, I. T. (2019) Short-chain diamines are the physiological substrates of PACE family efflux pumps. *Proc Natl Acad Sci U S A* **116**, 18015-18020
10. Shi, Z., Wang, Q., Li, Y., Liang, Z., Xu, L., Zhou, J., Cui, Z., and Zhang, L. H. (2019) Putrescine Is an Intraspecies and Interkingdom Cell-Cell Communication Signal Modulating the Virulence of *Dickeya zeae*. *Front Microbiol* **10**, 1950
11. Maynard, N. D., Birch, E. W., Sanghvi, J. C., Chen, L., Gutschow, M. V., and Covert, M. W. (2010) A forward-genetic screen and dynamic analysis of lambda phage host-dependencies reveals an extensive interaction network and a new anti-viral strategy. *PLoS Genet* **6**, e1001017
12. Rodionov, D. A., Gelfand, M. S., Mironov, A. A., and Rakhmaninova, A. B. (2001) Comparative approach to analysis of regulation in complete genomes: multidrug resistance systems in gamma-proteobacteria. *J Mol Microbiol Biotechnol* **3**, 319-324
13. Durand, S., and Storz, G. (2010) Reprogramming of anaerobic metabolism by the FnrS small RNA. *Mol Microbiol* **75**, 1215-1231
14. Yeo, S. J., Jeong, J. H., Yu, S. N., and Kim, Y. G. (2012) Crystallization and preliminary X-ray crystallographic analysis of YgjG from *Escherichia coli*. *Acta Crystallogr Sect F Struct Biol Cryst Commun* **68**, 1070-1072
15. Schneider, B. L., and Reitzer, L. (2012) Pathway and enzyme redundancy in putrescine catabolism in *Escherichia coli*. *J Bacteriol* **194**, 4080-4088
16. Park, S. A., Park, Y. S., and Lee, K. S. (2014) Kinetic characterization and molecular modeling of NAD(P)(+)-dependent succinic semialdehyde dehydrogenase from *Bacillus subtilis* as an ortholog YneI. *J Microbiol Biotechnol* **24**, 954-958
17. Luo, L. H., Seo, J. W., Heo, S. Y., Oh, B. R., Kim, D. H., and Kim, C. H. (2013) Identification and characterization of *Klebsiella pneumoniae* aldehyde dehydrogenases increasing production of 3-hydroxypropionic acid from glycerol. *Bioprocess Biosyst Eng* **36**, 1319-1326
18. Cho, B. K., Kim, D., Knight, E. M., Zengler, K., and Palsson, B. O. (2014) Genome-scale reconstruction of the sigma factor network in *Escherichia coli*: topology and functional states. *BMC Biol* **12**, 4

19. Schneider, B. L., Ruback, S., Kiupakis, A. K., Kasbarian, H., Pybus, C., and Reitzer, L. (2002) The *Escherichia coli* gabDTPC operon: specific gamma-aminobutyrate catabolism and nonspecific induction. *J Bacteriol* **184**, 6976-6986
20. Joloba, M. L., Clemmer, K. M., Sledjeski, D. D., and Rather, P. N. (2004) Activation of the gab operon in an RpoS-dependent manner by mutations that truncate the inner core of lipopolysaccharide in *Escherichia coli*. *J Bacteriol* **186**, 8542-8546
21. Metzner, M., Germer, J., and Hengge, R. (2004) Multiple stress signal integration in the regulation of the complex sigma S-dependent csiD-ygaF-gabDTP operon in *Escherichia coli*. *Mol Microbiol* **51**, 799-811
22. Kurihara, S., Kato, K., Asada, K., Kumagai, H., and Suzuki, H. (2010) A putrescine-inducible pathway comprising PuuE-YneI in which gamma-aminobutyrate is degraded into succinate in *Escherichia coli* K-12. *J Bacteriol* **192**, 4582-4591
23. Fuhrer, T., Chen, L., Sauer, U., and Vitkup, D. (2007) Computational prediction and experimental verification of the gene encoding the NAD<sup>+</sup>/NADP<sup>+</sup>-dependent succinate semialdehyde dehydrogenase in *Escherichia coli*. *J Bacteriol* **189**, 8073-8078
24. Shepherd, M., Sanguinetti, G., Cook, G. M., and Poole, R. K. (2010) Compensations for diminished terminal oxidase activity in *Escherichia coli*: cytochrome bd-II-mediated respiration and glutamate metabolism. *J Biol Chem* **285**, 18464-18472
25. Zheng, H., Beliaevsky, A., Tchigvintsev, A., Brunzelle, J. S., Brown, G., Flick, R., Evdokimova, E., Wawrzak, Z., Mahadevan, R., Anderson, W. F., Savchenko, A., and Yakunin, A. F. (2013) Structure and activity of the NAD(P)<sup>+</sup>-dependent succinate semialdehyde dehydrogenase YneI from *Salmonella typhimurium*. *Proteins* **81**, 1031-1041
26. Gulevich, A. Y., Skorokhodova, A. Y., and Debabov, V. G. (2016) [*Escherichia coli* ydiO and ydiQRST genes encode components of acyl-CoA dehydrogenase complex of anaerobic fatty acid beta-oxidation pathway]. *Genetika* **52**, 1210-1214
27. Sastry, A. V., Gao, Y., Szubin, R., Hefner, Y., Xu, S., Kim, D., Choudhary, K. S., Yang, L., King, Z. A., and Palsson, B. O. (2019) The *Escherichia coli* transcriptome mostly consists of independently regulated modules. *Nat Commun* **10**, 5536

28. Skovierova, H., Rezuchova, B., Homerova, D., Roberts, M., and Kormanec, J. (2006) Characterization of the sigmaE-dependent rpoEp3 promoter of *Salmonella enterica* serovar Typhimurium. *FEMS Microbiol Lett* **261**, 53-59
29. Barbosa, T. M., and Levy, S. B. (2000) Differential expression of over 60 chromosomal genes in *Escherichia coli* by constitutive expression of MarA. *J Bacteriol* **182**, 3467-3474
30. Berger, P., Kouzel, I. U., Berger, M., Haarmann, N., Dobrindt, U., Koudelka, G. B., and Mellmann, A. (2019) Carriage of Shiga toxin phage profoundly affects *Escherichia coli* gene expression and carbon source utilization. *BMC Genomics* **20**, 504
31. Bottery, M. J., Wood, A. J., and Brockhurst, M. A. (2019) Temporal dynamics of bacteria-plasmid coevolution under antibiotic selection. *ISME J* **13**, 559-562
32. Chetri, S., Singha, M., Bhowmik, D., Nath, K., Chanda, D. D., Chakravarty, A., and Bhattacharjee, A. (2019) Transcriptional response of OmpC and OmpF in *Escherichia coli* against differential gradient of carbapenem stress. *BMC Res Notes* **12**, 138
33. Iyer, S., Le, D., Park, B. R., and Kim, M. (2018) Distinct mechanisms coordinate transcription and translation under carbon and nitrogen starvation in *Escherichia coli*. *Nat Microbiol* **3**, 741-748
34. Shimizu, K. (2016) Metabolic Regulation and Coordination of the Metabolism in Bacteria in Response to a Variety of Growth Conditions. *Adv Biochem Eng Biotechnol* **155**, 1-54
35. Iyer, R., and Delcour, A. H. (1997) Complex inhibition of OmpF and OmpC bacterial porins by polyamines. *J Biol Chem* **272**, 18595-18601
36. Chubiz, L. M., and Rao, C. V. (2011) Role of the mar-sox-rob regulon in regulating outer membrane porin expression. *J Bacteriol* **193**, 2252-2260
37. Tavio, M. M., Aquili, V. D., Poveda, J. B., Antunes, N. T., Sanchez-Cespedes, J., and Vila, J. (2010) Quorum-sensing regulator sdiA and marA overexpression is involved in in vitro-selected multidrug resistance of *Escherichia coli*. *J Antimicrob Chemother* **65**, 1178-1186
38. Gao, Y., Yurkovich, J. T., Seo, S. W., Kabimoldayev, I., Drager, A., Chen, K., Sastry, A. V., Fang, X., Mih, N., Yang, L., Eichner, J., Cho, B. K., Kim, D., and Palsson, B. O. (2018) Systematic discovery of uncharacterized transcription factors in *Escherichia coli* K-12 MG1655. *Nucleic Acids Res* **46**, 10682-10696

39. Doughty, D. M., Kurth, E. G., Sayavedra-Soto, L. A., Arp, D. J., and Bottomley, P. J. (2008) Evidence for involvement of copper ions and redox state in regulation of butane monooxygenase in *Pseudomonas butanovora*. *J Bacteriol* **190**, 2933-2938
40. Smale, S. T. (2010) Beta-galactosidase assay. *Cold Spring Harb Protoc* **2010**, pdb prot5423
41. Cho, B. K., Knight, E. M., and Palsson, B. O. (2006) PCR-based tandem epitope tagging system for *Escherichia coli* genome engineering. *Biotechniques* **40**, 67-72
42. Latif, H., Federowicz, S., Ebrahim, A., Tarasova, J., Szubin, R., Utrilla, J., Zengler, K., and Palsson, B. O. (2018) ChIP-exo interrogation of Crp, DNA, and RNAP holoenzyme interactions. *PLoS One* **13**, e0197272
43. Kim, D., Seo, S. W., Gao, Y., Nam, H., Guzman, G. I., Cho, B. K., and Palsson, B. O. (2018) Systems assessment of transcriptional regulation on central carbon metabolism by Cra and CRP. *Nucleic Acids Res* **46**, 2901-2917

## TABLE AND FIGURES LEGENDS

Table 1. ChIP-exo detected PtrR binding sites in the promoter regions and intergenic regions of *E. coli* genes.

Table 2. Differentially expressed genes revealed by the RNAseq data for a *ptrR* mutant and WT *E. coli* BW25113 strain during growth in M9 medium with L-Glutamate and Putrescine as nitrogen sources and glycerol as the primary carbon source

Figure 1. Regulation of putrescine utilization and the response to induced stress. **A.** The putrescine utilization pathways. PtrR (YneJ) regulated genes are shown in yellow boxes. Abbreviations: GABAld – gamma-aminobutyraldehyde, PatA - putrescine aminotransferase, PatD - gamma-aminobutyraldehyde dehydrogenase, YneI (Sad) - succinate-semialdehyde dehydrogenase, YneH (GlsB) - glutaminase. The *puu* operon is regulated by the PuuR, ArcA and FNR transcription factors. **B.** The PtrR (YneJ) regulation of *fmrS* and the cascade regulation for *ompF* as well as Ptr utilization. The cascade regulation of MarA mRNA by *fmrS* and MarA transcriptional regulation of *micF* - small RNA (sRNA), regulating OmpF mRNA stability.

Figure 2. *yne* promoter regulation. **A.** The *yneJ* and *yneI* promoter region for PtrR (YneJ) binding, identified by ChIP-exo, **B.** The predicted consensus in the WT BW25113 strain sequence, and the corresponding consensus with the *yne* operon from other proteobacteria. **C.** The promoter activity measured by  $\beta$ -galactosidase assay for the WT-wild type and *yneJ* mutant strains grown for 3 hours in M9

medium with 0.4% glycerol and the nitrogen source as marked: either NH-NH<sub>4</sub>, or Gln-glutamine, or Glu-glutamate with 10 mM Ptr added.

Figure 3. Growth of the *ptrR* (*yneJ*) mutant (blue marker) compared to the WT BW25113 strain (red marker) with 20 mM L-Glu as the sole nitrogen source and glycerol as the carbon source, **A.** Growth in overnight tubes. The glycerol concentration was 0.2% (upper) or 0.8% (lower). **B.** The WT BW25113 and *ptrR* mutant strains were grown under the same conditions with 0.2 % glycerol in 96-well plates (upper) or in normal glucose-M9 medium (lower).

Figure 4. Growth of *yneJ*, *yneH* and *ydiF* mutants compared to the WT BW25113 strain **A.** M9 medium with 20 mM Glu and 10 or 20 mM Ptr, as nitrogen sources and 0.4% glycerol (v/v) as the primary carbon source. **B.** The cells were grown under the same conditions, but 20 mM Ptr was added. **C.** The cells were grown in M9-glucose medium.

Figure 5. The PtrR phylogenetic tree and the predicted binding consensus sequence for PtrR in other Proteobacteria. The regulons for several Proteobacterial representatives are shown.

Table S1. The upregulated genes detected by the RNAseq data for *ptrR* mutant normalized to WT *E. coli* BW25113 strain during growth in M9 medium with L-Glutamate as single nitrogen source and glycerol as the carbon source

Table S2 Biolog plate PM2A area under the growth curve for the growth *ptrR* (*yneJ*) *E. coli* mutant and WT *E. coli* BW25113 in M9 medium with no carbon source with L-Glutamate added as supplement.

Table S3. Differentially expressed genes for RNAseq data for *ptrR* mutant and WT *E. coli* BW25113 strain during growth in M9 medium with L-glutamine and putrescine as supplement and glycerol as the carbon source.

Figure S1. The *gltS* promoter region for PtrR binding, identified by ChIP-exo.

Figure S2. The Biolog Plate PM2A (at time point 80) for the growth in M9 medium with no primary carbon source but with L-Glutamate added as a supplement **A.** *ptrR* *E. coli* mutant versus the BW25113 strains **B.** WT *E. coli* BW25113

Fig. S3 The *yihQOP-ompL* operon in Enterobacteria. The gens are marked as arrows numbered: 1-*ompL*, 2-*yihOP* and 3-*yihQ*

Fig. S4 The *marRA* (1, 4) and *marB* (5) chromosomal gene cluster in Enterobacteria. The clusters conserved conserved and include PtrR regulated *ptrR* (8) conserved *yne* (9, 3, 7) operon and *uxaB-yneE* (2,15) genes. The additional conserved gene in the cluster is *ydeE* encoding MFS family transporter.

Fig. S5 Fluorescent polarization assay for PtrR binding to the predicted DNA-binding sequence and PhrR as control.



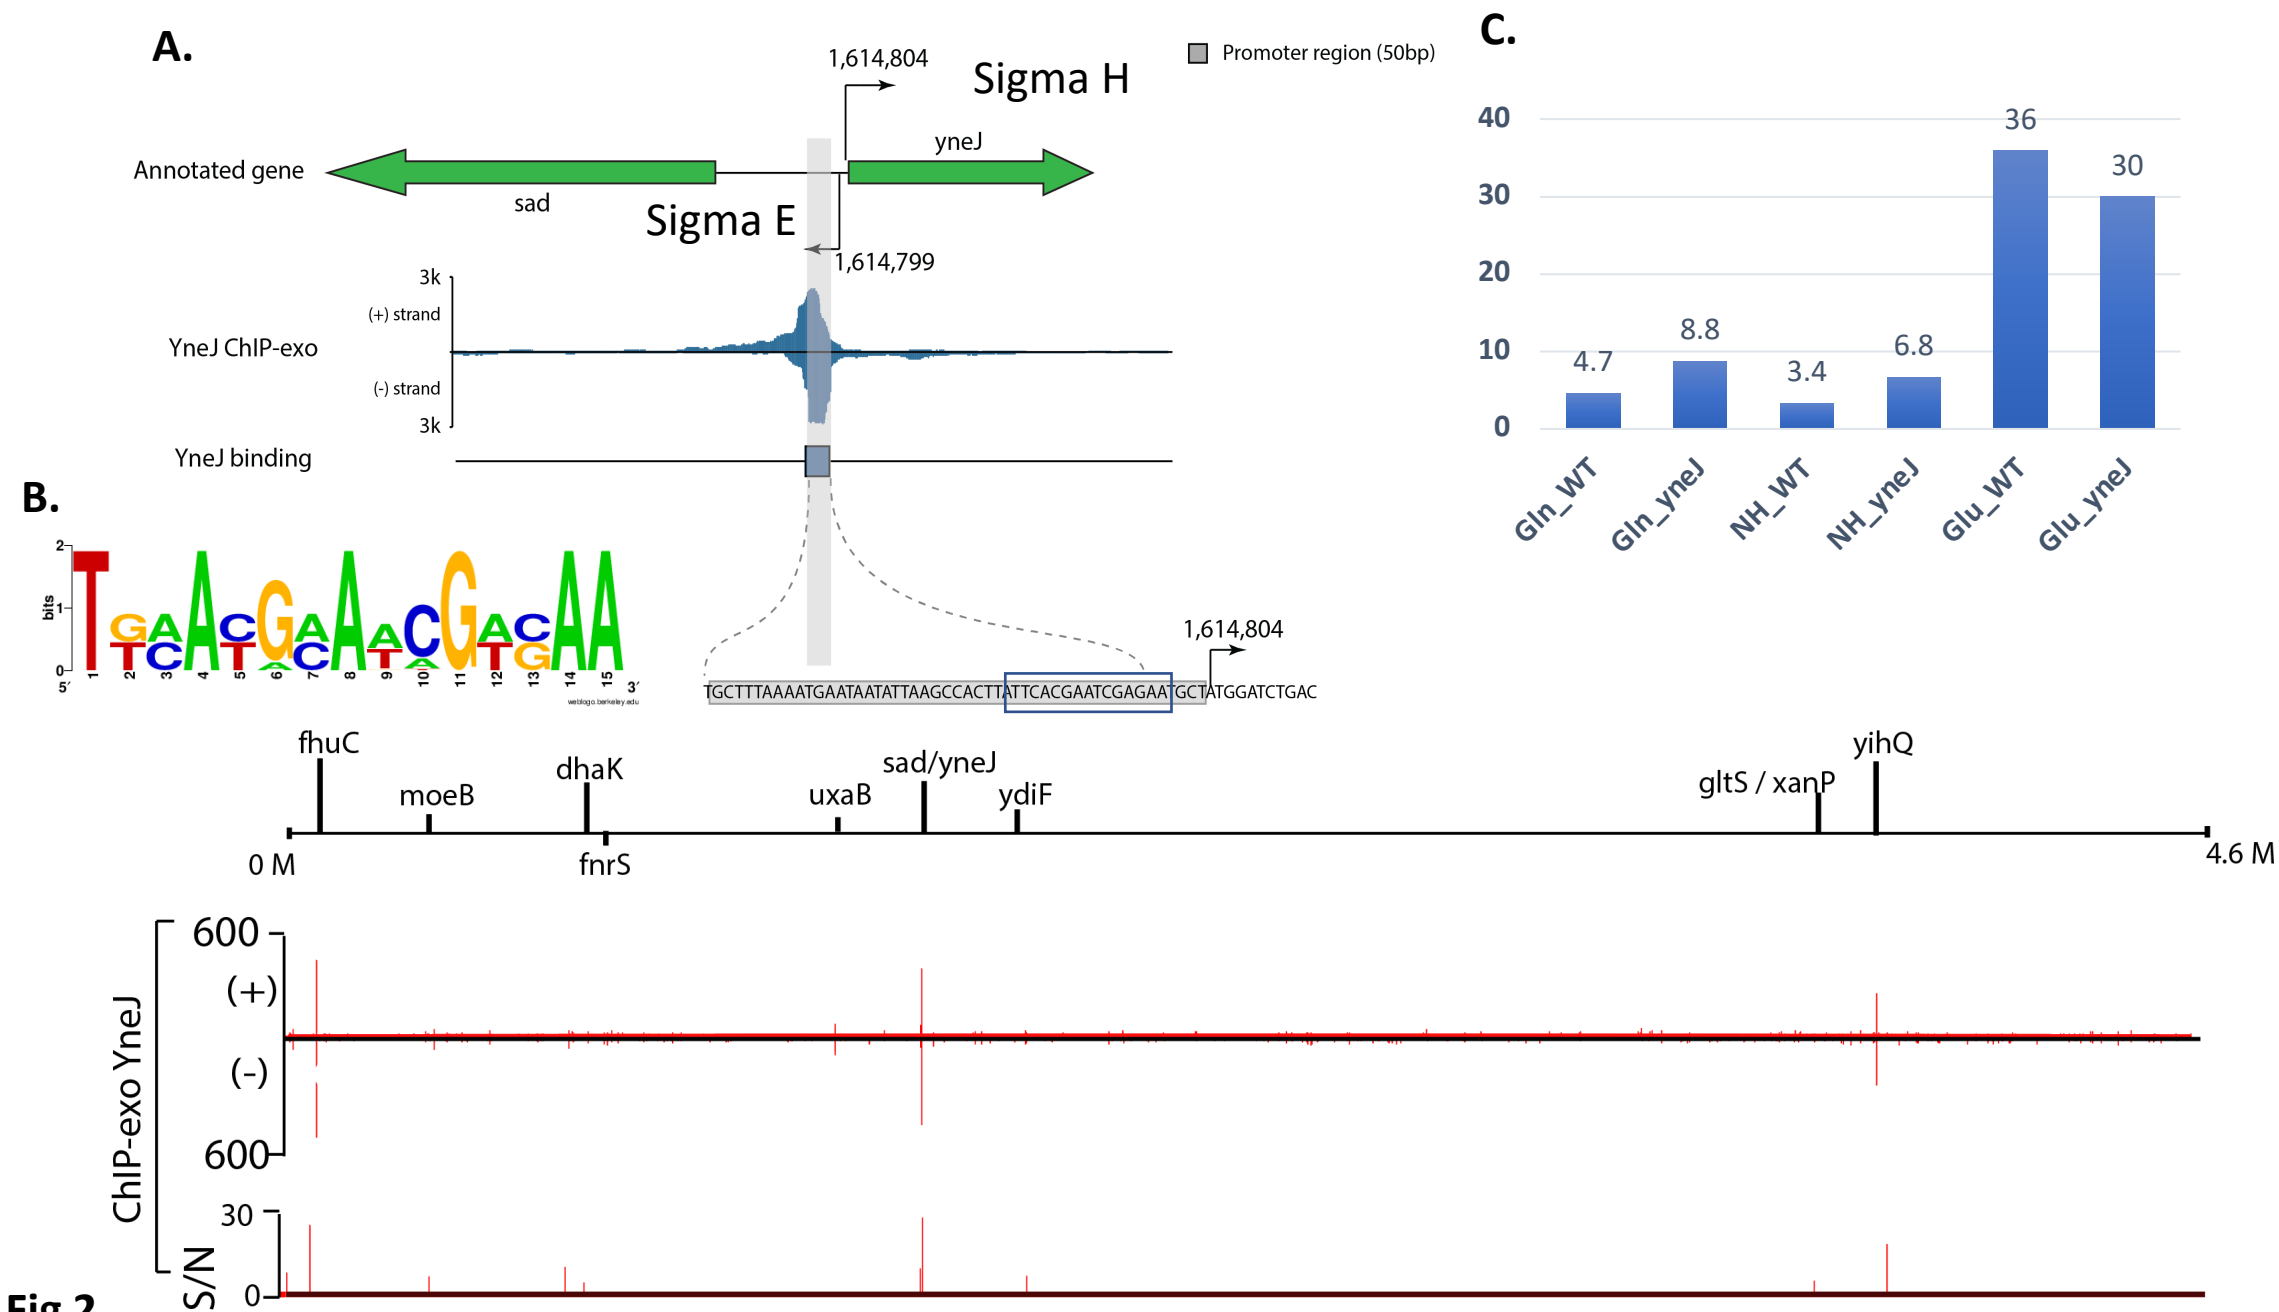

**Fig 2.**



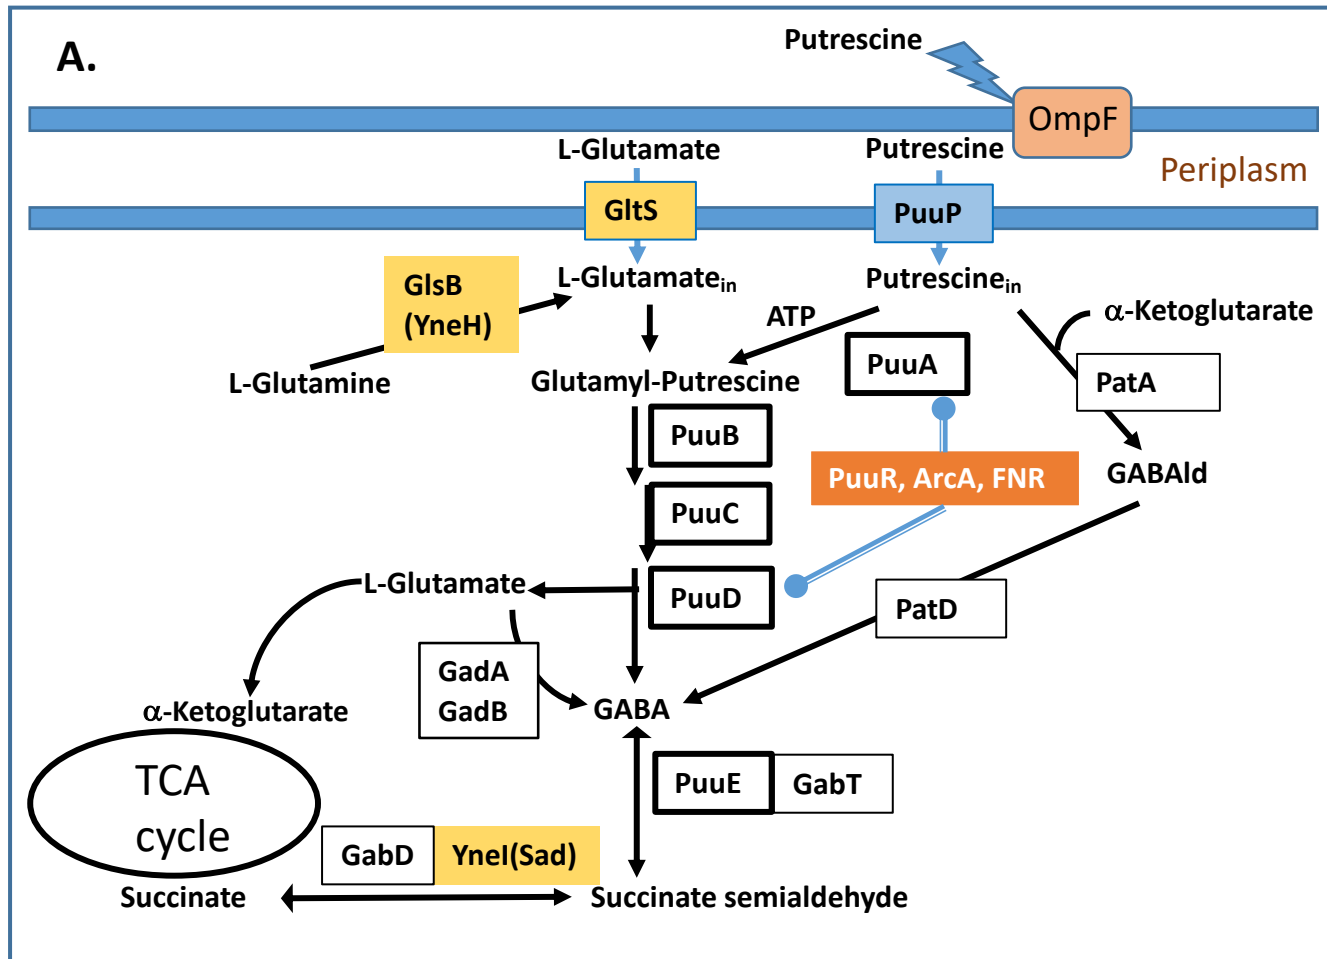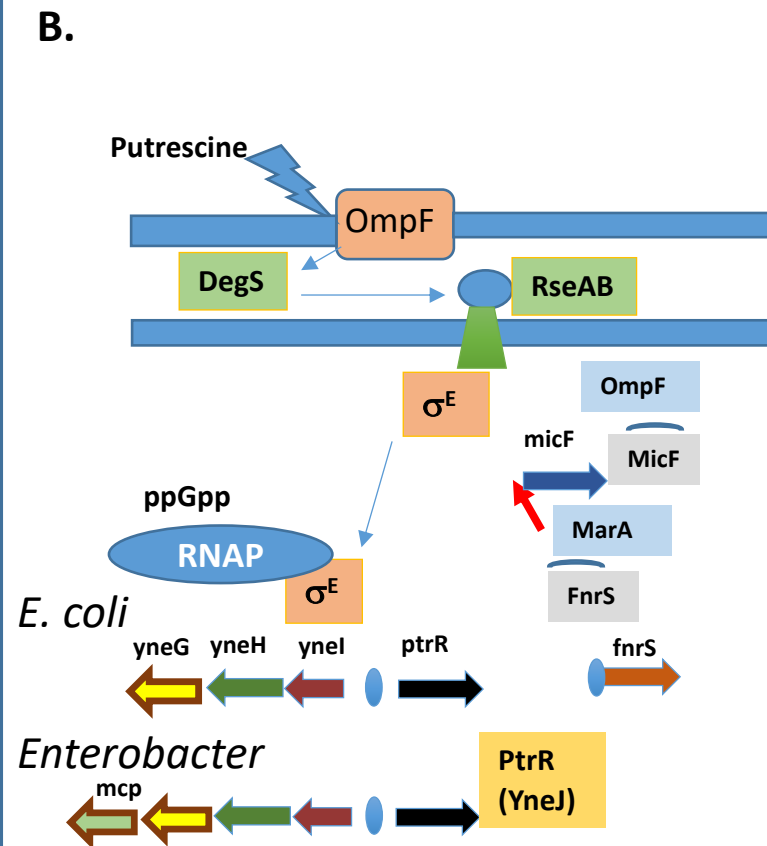

**Fig 1.**

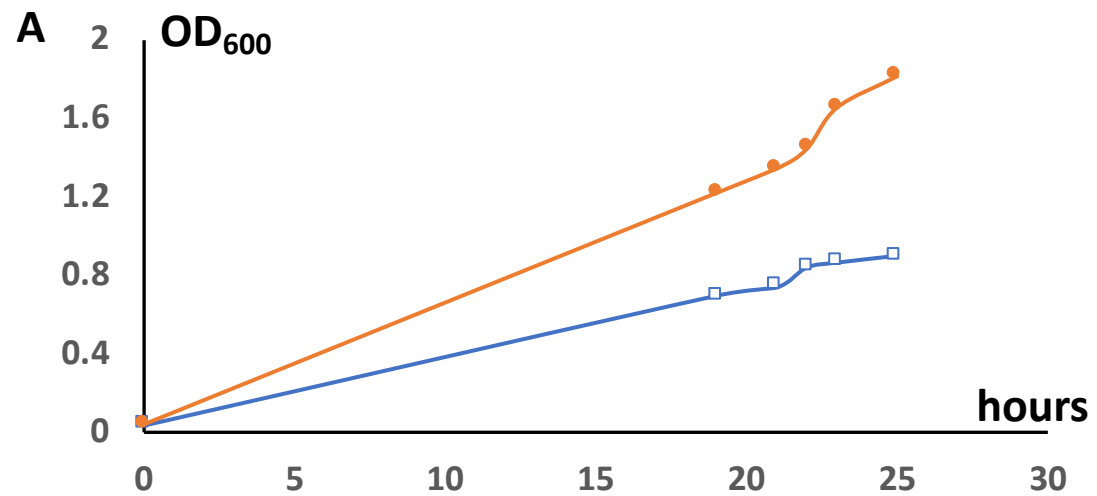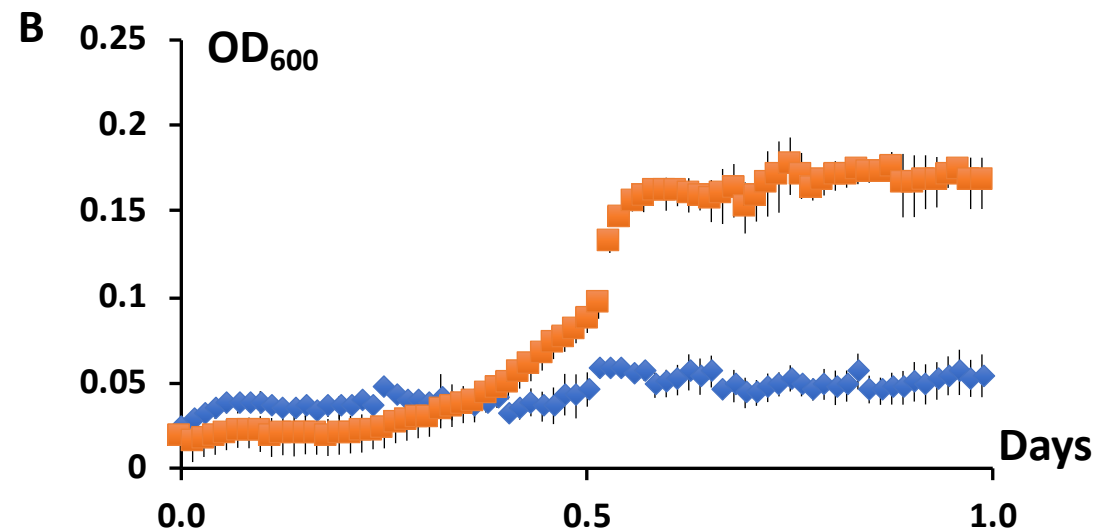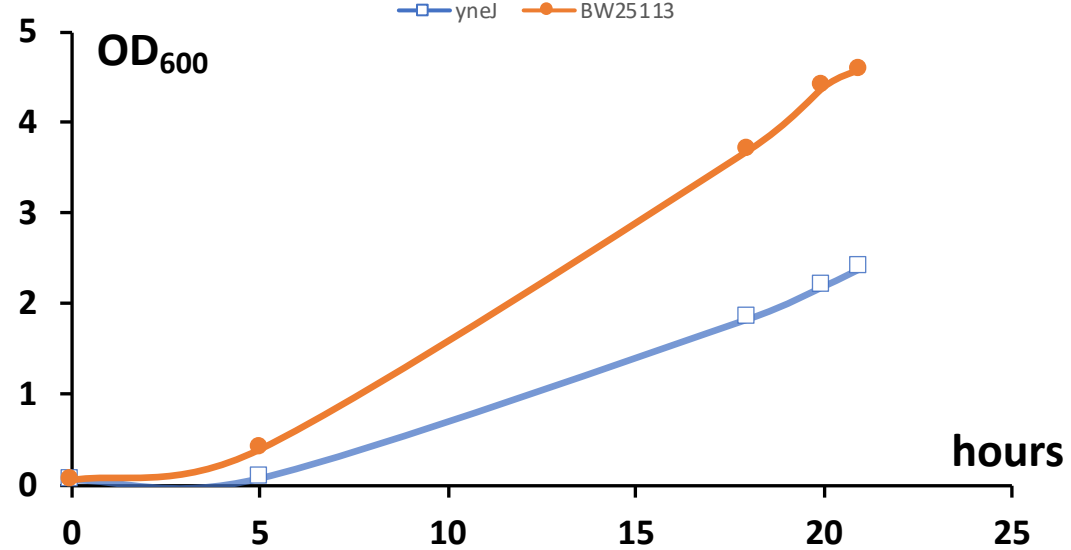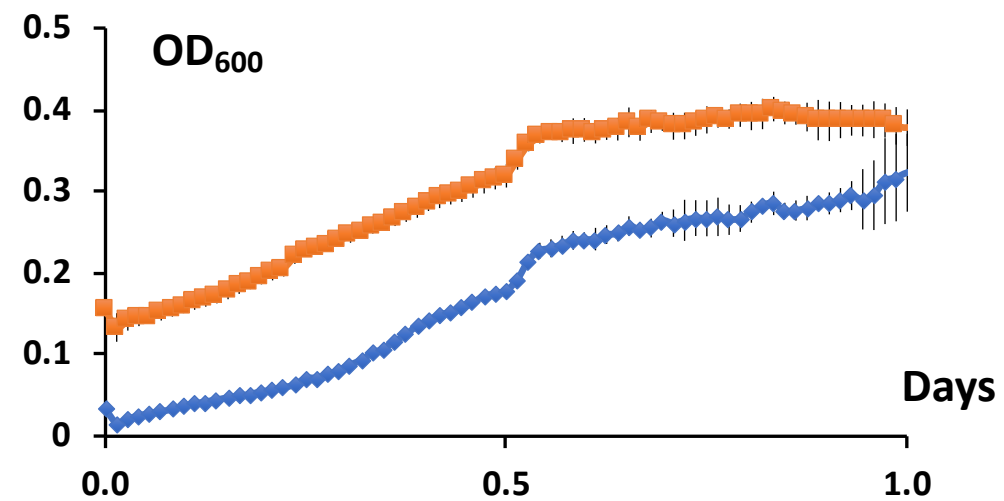

**Fig. 3**

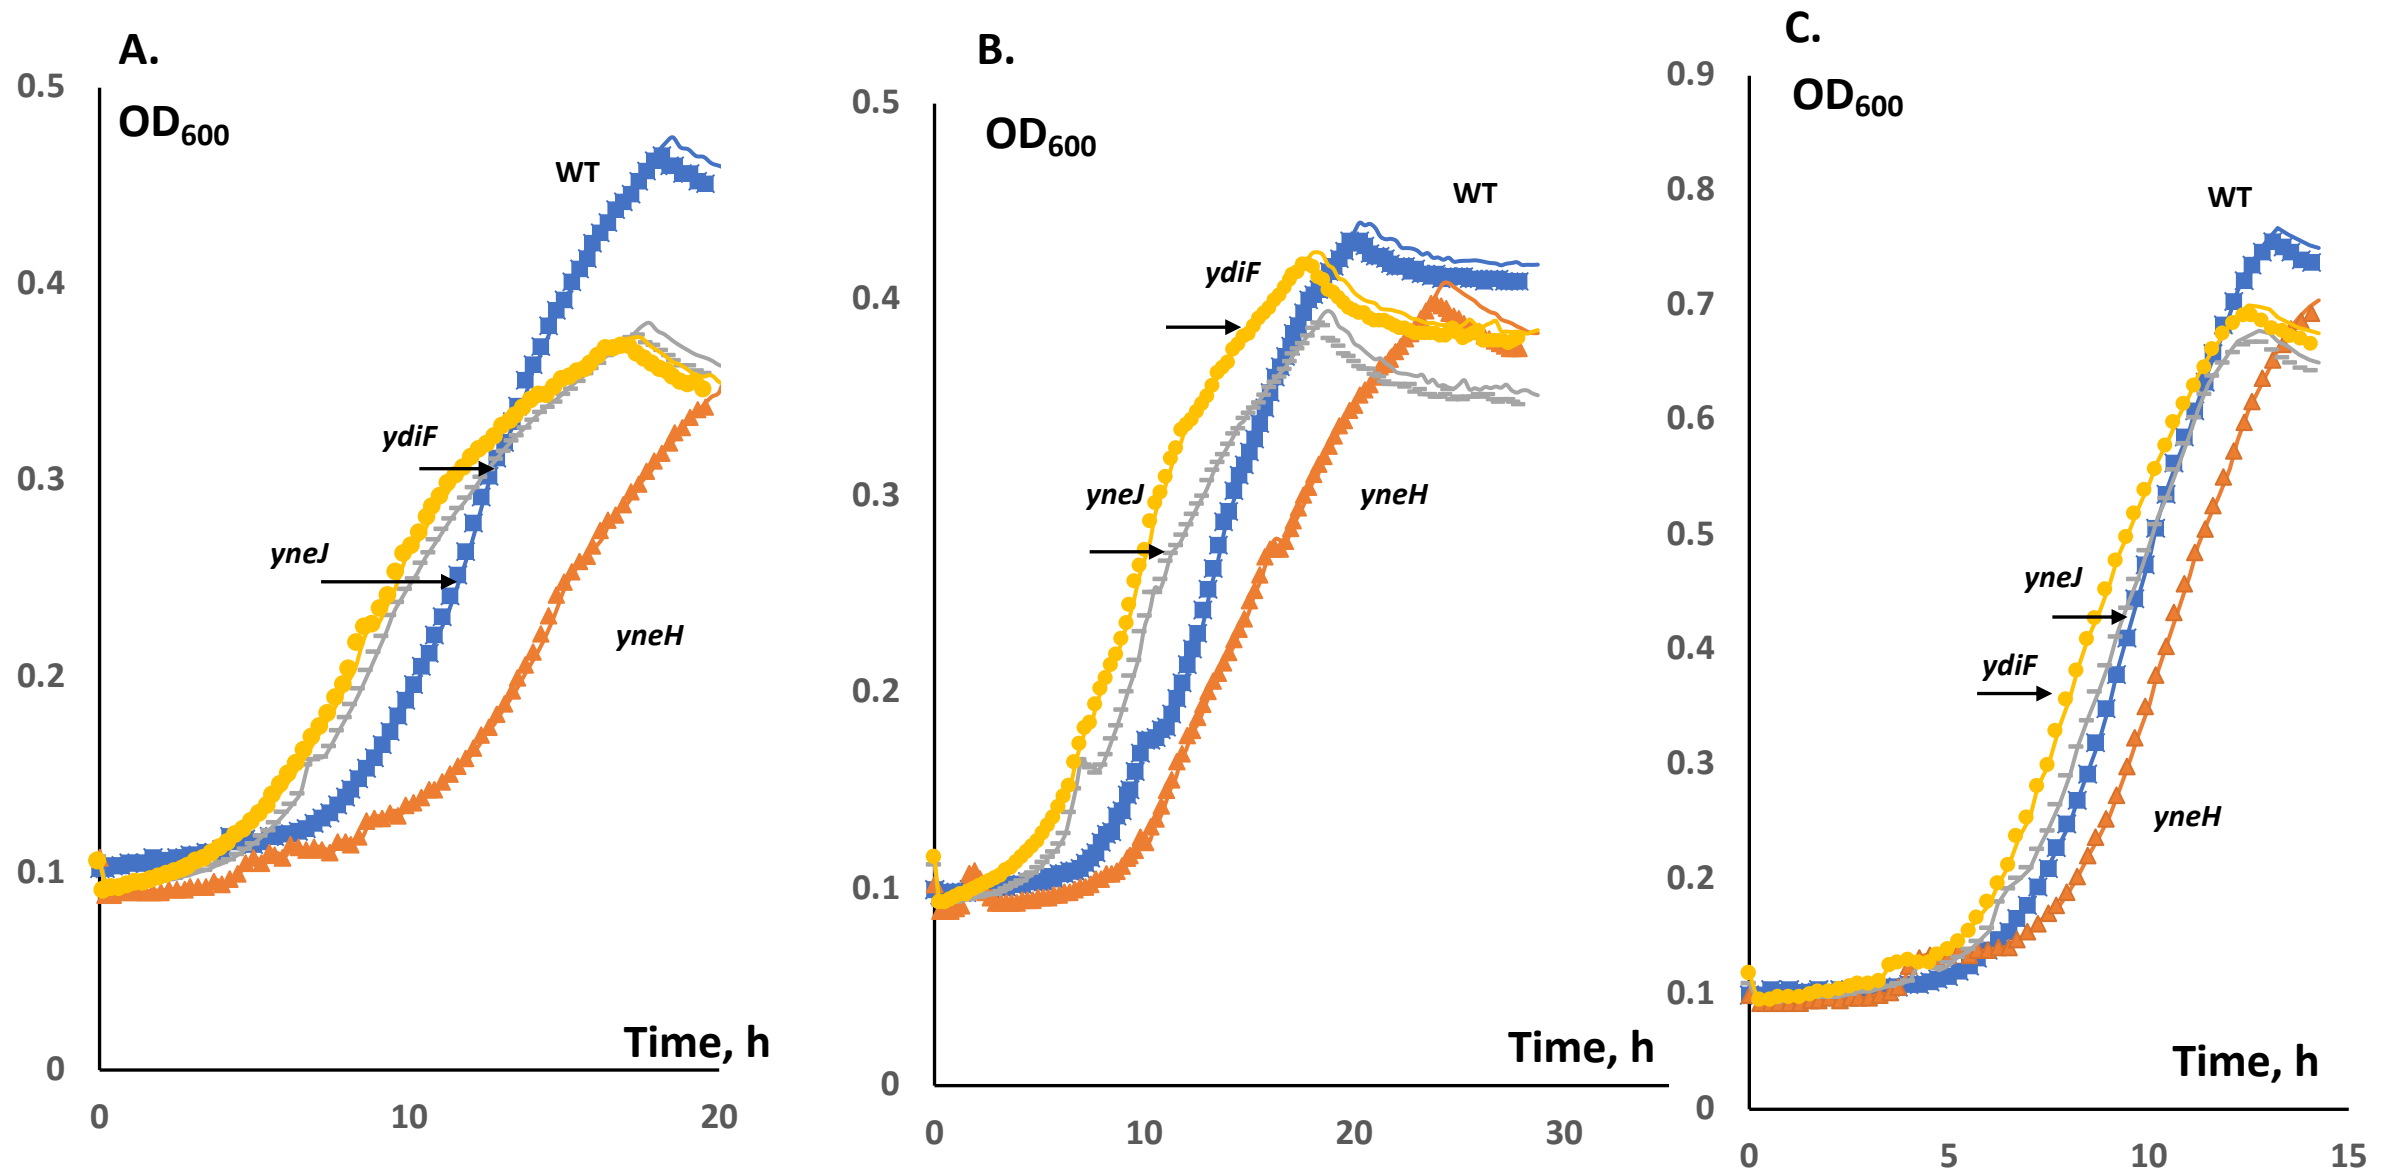

Fig 4.

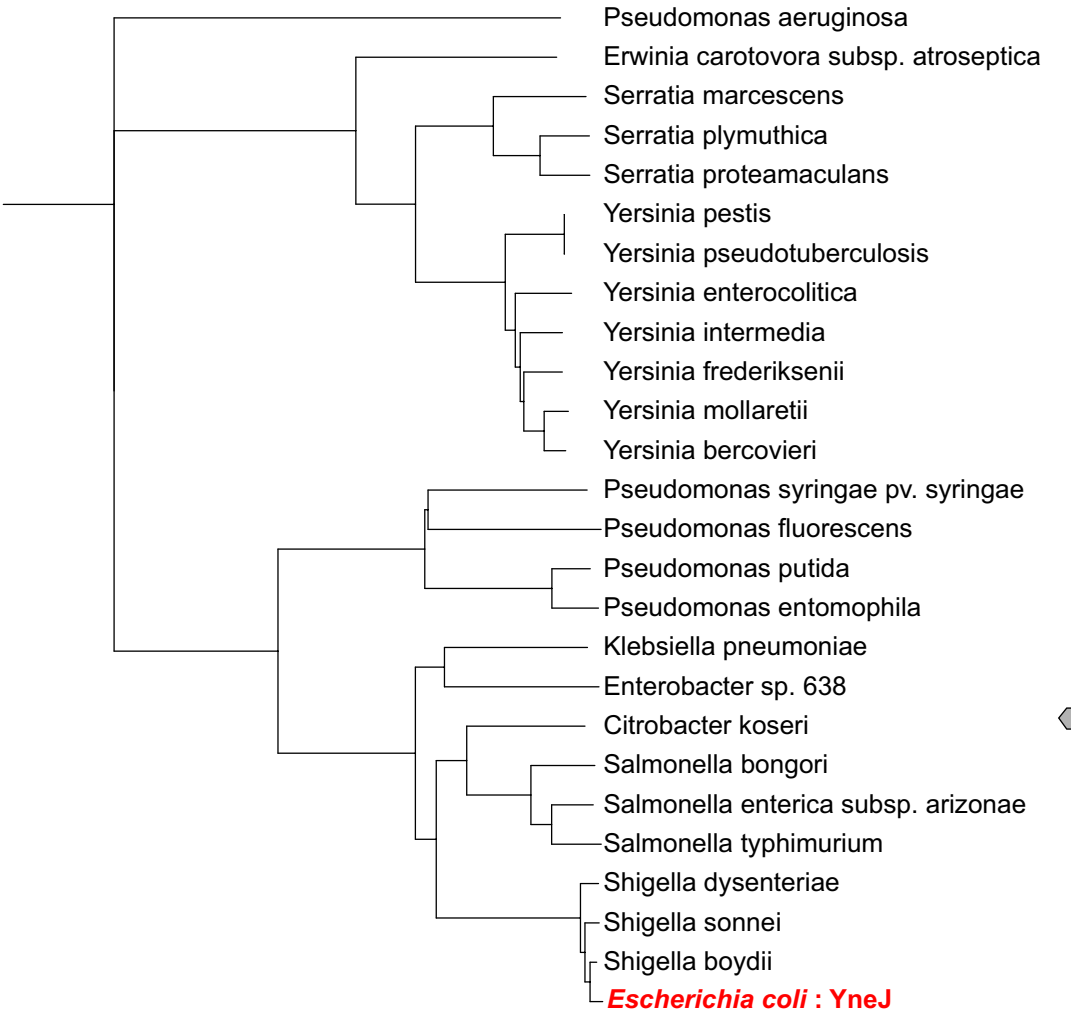

Tree scale: 0.1

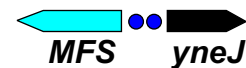

### • Tandem YneJ site upstream of *MFS* orthologs (Group 2)

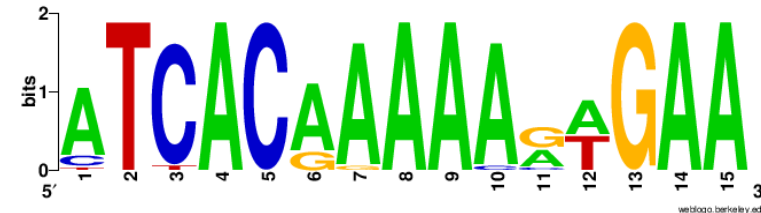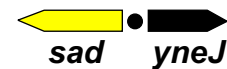

### • Single YneJ site upstream of *sad* orthologs (Group 1)

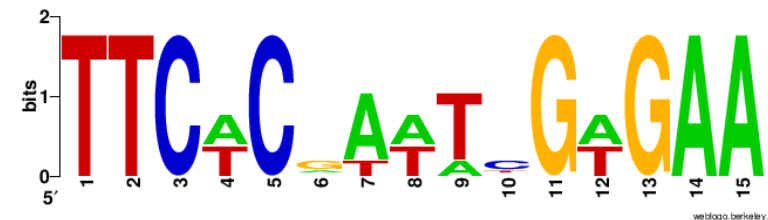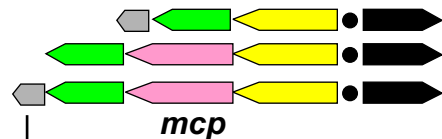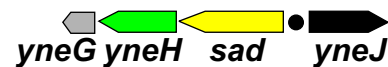

| Gene | b_number | Name                                                          | Intesnsity | Binding location  |
|------|----------|---------------------------------------------------------------|------------|-------------------|
| fhuC | b0151    | iron(III) hydroxamate ABC transporter ATP binding subunit     | 27.9       | Promoter          |
| moeB | b0826    | molybdopterin-synthase adenyltransferase                      | 2.7        | Promoter          |
| dhaK | b1200    | dihydroxyacetone kinase subunit K                             | 2.27       | Promoter          |
| fnrS | b4699    | FnrS small regulatory RNA                                     | 2          | small RNA         |
| uxaB | b1521    | tagaturonate reductase                                        | 3.33       | Promoter          |
| sad  | b1525    | succinate semialdehyde dehydrogenase (NAD(P)+) Sad            | 17.5       | Promoter          |
| yneJ | b1525    | putative LysR-type DNA-binding transcriptional regulator YneJ | 17.5       | Promoter          |
| ydiF | b1694    | putative acetate-CoA transferase YdiF                         | 2.1        | Intragenic region |
| gltS | b3653    | glutamate:sodium symporter                                    | 2.3        | Promoter          |
| xanP | b3654    | xanthine:H <sup>+</sup> symporter XanP                        | 2.3        | Promoter          |
| yihQ | b3878    | sulfoquinovosidase                                            | 7.6        | Intragenic region |

Table1

|       | Base_Mean | log2 Fold<br>Change | P-value  |       |                                                         |
|-------|-----------|---------------------|----------|-------|---------------------------------------------------------|
| b0123 | 178.3     | 1.8                 | 1.53E-04 | cueO  | Blue copper oxidase CueO                                |
| b0484 | 521.3     | 1.8                 | 3.00E-05 | copA  | Copper-exporting P-type ATPase                          |
| b0570 | 112.3     | 2.2                 | 4.39E-04 | cusS  | Sensor histidine kinase CusS                            |
| b0571 | 181.3     | 2.5                 | 2.97E-05 | cusR  | Transcriptional regulatory protein                      |
| b0572 | 949.3     | 7.8                 | 1.42E-05 | cusC  | Cation efflux system protein CusC                       |
| b0574 | 207.7     | 6.0                 | 3.81E-05 | cusB  | Cation efflux system protein CusB                       |
| b0575 | 280.5     | 4.8                 | 6.52E-05 | cusA  | Cation efflux system protein CusA                       |
| b0778 | 125.8     | -1.4                | 1.11E-04 | bioD1 | ATP-dependent dethiobiotin synthetase BioD 1            |
| b1297 | 705.7     | 1.9                 | 4.64E-07 | puuA  | Gamma-glutamylputrescine synthetase                     |
| b1298 | 336.6     | 1.9                 | 6.21E-05 | puuD  | Gamma-glutamyl-gamma-aminobutyrate hydrolase PuuD       |
| b1299 | 113.1     | 1.3                 | 9.24E-05 | puuR  | HTH-type transcriptional regulator PuuR                 |
| b1302 | 160.5     | 1.6                 | 3.16E-04 | puuE  | 4-aminobutyrate aminotransferase PuuE                   |
| b1495 | 72.6      | -1.9                | 4.59E-07 | nuoK  | NADH-quinone oxidoreductase subunit K                   |
| b1496 | 62.9      | -2.3                | 1.25E-06 | yddA  | Inner membrane ABC transporter ATP-binding protein YddA |
| b1526 | 26.1      | -6.2                | 9.41E-06 | yneJ  | Uncharacterized HTH-type transcriptional regulator YneJ |
| b1596 | 221.4     | -1.5                | 3.06E-04 | ynfM  | Inner membrane transport protein YnfM                   |
| b1656 | 323.2     | 4.8                 | 5.46E-05 | sodB  | Superoxide dismutase [Fe]                               |
| b1717 | 55.4      | 2.4                 | 3.57E-05 | rpml  | 50S ribosomal protein L35                               |
| b1886 | 297.6     | 1.4                 | 4.20E-05 | tar   | Methyl-accepting chemotaxis protein II                  |
| b1889 | 60.9      | 1.6                 | 3.08E-04 | motB  | Motility protein B                                      |
| b2094 | 1718.5    | -1.4                | 6.09E-05 | gatA  | PTS system galactitol-specific EIIA component           |
| b2106 | 322.7     | -1.5                | 5.47E-07 | rsnA  | Nickel/cobalt efflux system RcnA                        |
| b3858 | 42.3      | 2.6                 | 1.29E-06 | yihD  | Protein YihD                                            |
| b3938 | 191.1     | 1.4                 | 3.84E-04 | metJ  | Met repressor                                           |
| b4142 | 196.5     | 1.9                 | 1.40E-04 | groS  | 10 kDa chaperonin                                       |

|         |        |     |          |      |                                                      |
|---------|--------|-----|----------|------|------------------------------------------------------|
| b4207   | 538.7  | 1.5 | 2.03E-05 | fkIB | FKBP-type 22 kDa peptidyl-prolyl cis-trans isomerase |
| b4314   | 1118.3 | 1.4 | 3.46E-04 | fimA | Type-1 fimbrial protein, A chain                     |
| b4640_1 | 15.7   | 3.2 | 3.45E-04 | yoeG |                                                      |
| Table 2 |        |     |          |      |                                                      |
